# Supplementary material for: Facile synthesis of size-tunable L-carnosine-capped silver nanoparticles and their role in metal ion sensing and catalytic degradation of p-nitrophenol
Source: publisher site journal article supplement (doi:10.3762/bjnano.15.124), 2024-12-06
Supplement: Additional file 1 [file 2190-4286-15-124-S1.pdf]

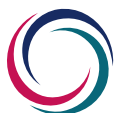

## Supporting Information

for

### **Facile synthesis of size-tunable L-carnosine-capped silver nanoparticles and their role in metal ion sensing and catalytic degradation of *p*-nitrophenol**

Akash Kumar, Ridhima Chadha, Abhishek Das, Nandita Maiti  
and Rayavarapu Raja Gopal

*Beilstein J. Nanotechnol.* **2024**, *15*, 1576–1592. doi:10.3762/bjnano.15.124

## Additional figures

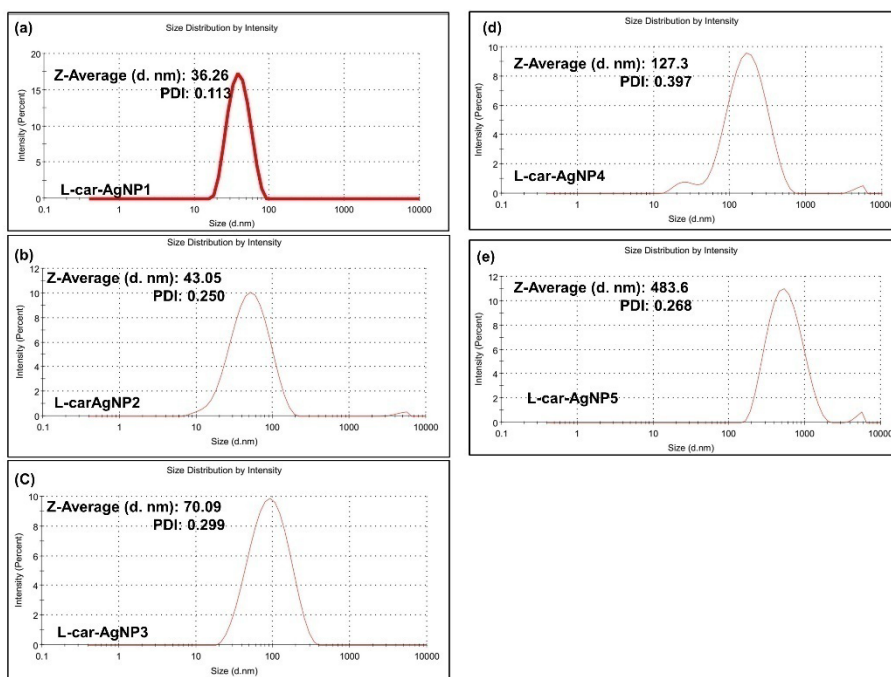

**Figure S1:** Hydrodynamic size of (a) L-car-AgNP1, (b) L-car-AgNP2, (c) L-car-AgNP3, (d) L-car-AgNP4, and (e) L-car-AgNP5.

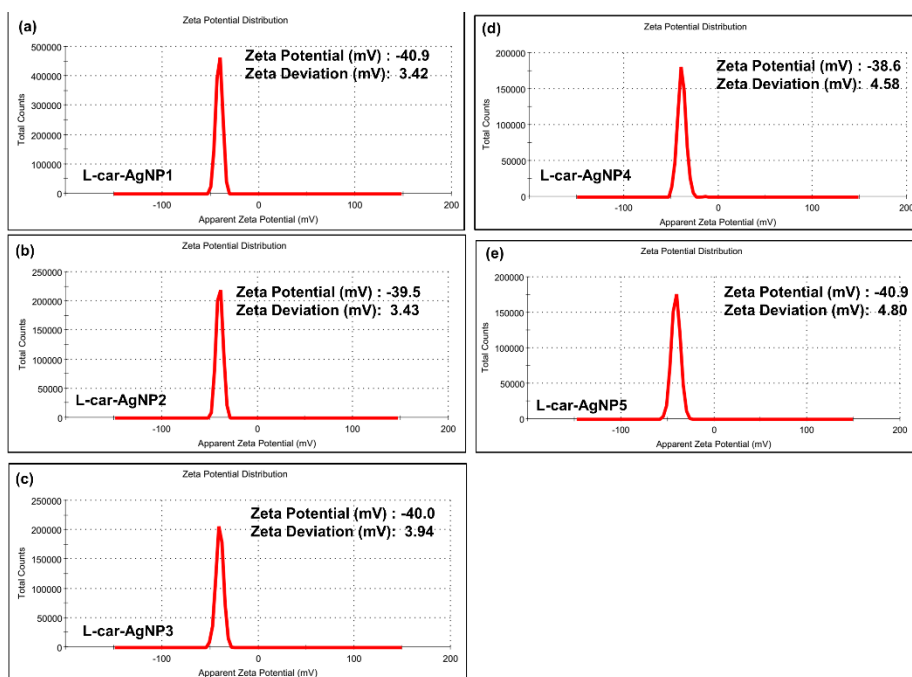

**Figure S2:** Zeta potential of (a) L-car-AgNP1, (b) L-car-AgNP2, (c) L-car-AgNP3, (d) L-car-AgNP4, and (e) L-car-AgNP5.

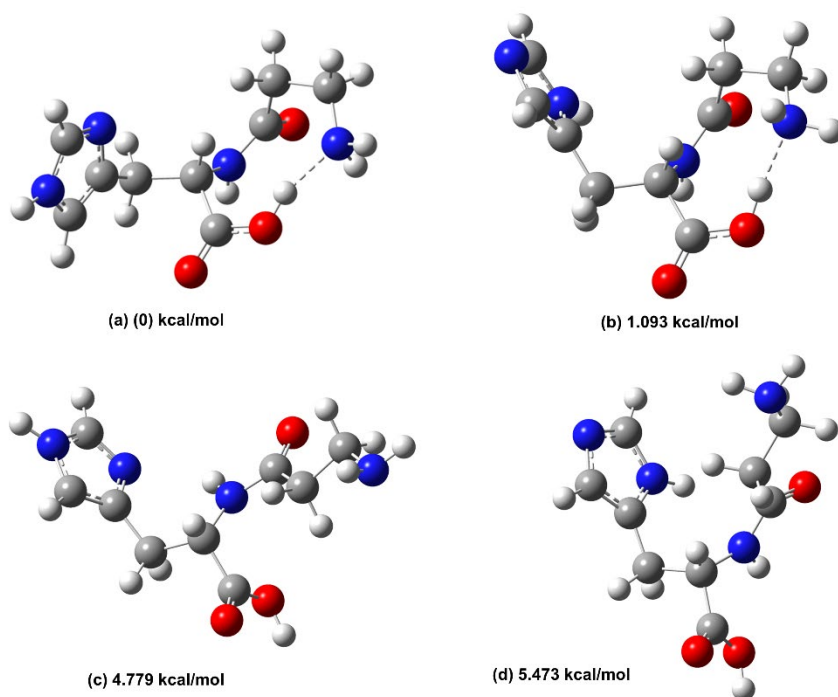

**Figure S3:** Optimized geometries of L-carnosine along with relative stabilization energies. The color codes to identify the atoms are N (blue), O (red), C (grey), and H (white).

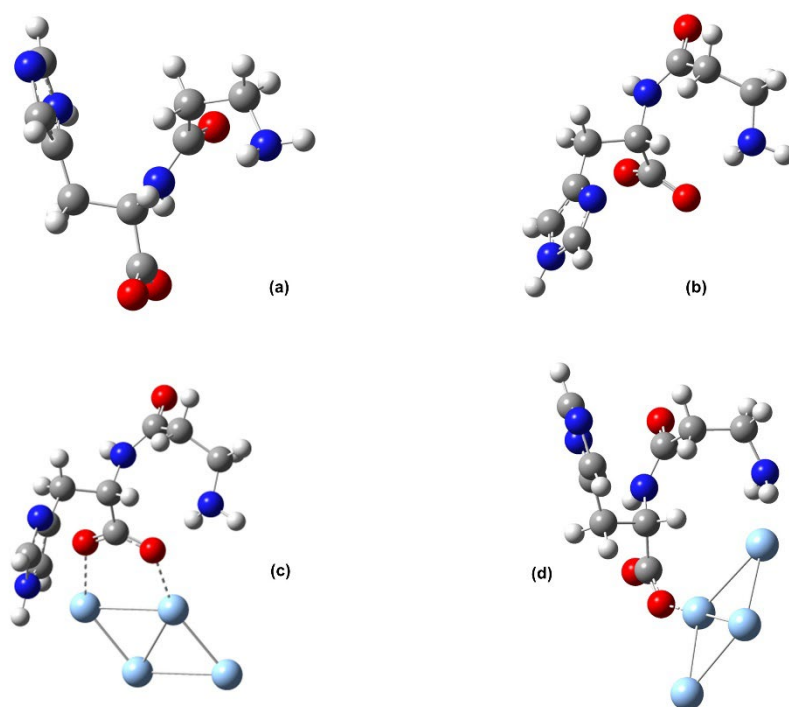

**Figure S4:** Optimized geometries of L-carnosine–AgNPs complex. The color codes to identify the atoms are N (blue), O (red), C (grey), H (white), and Ag (light blue).

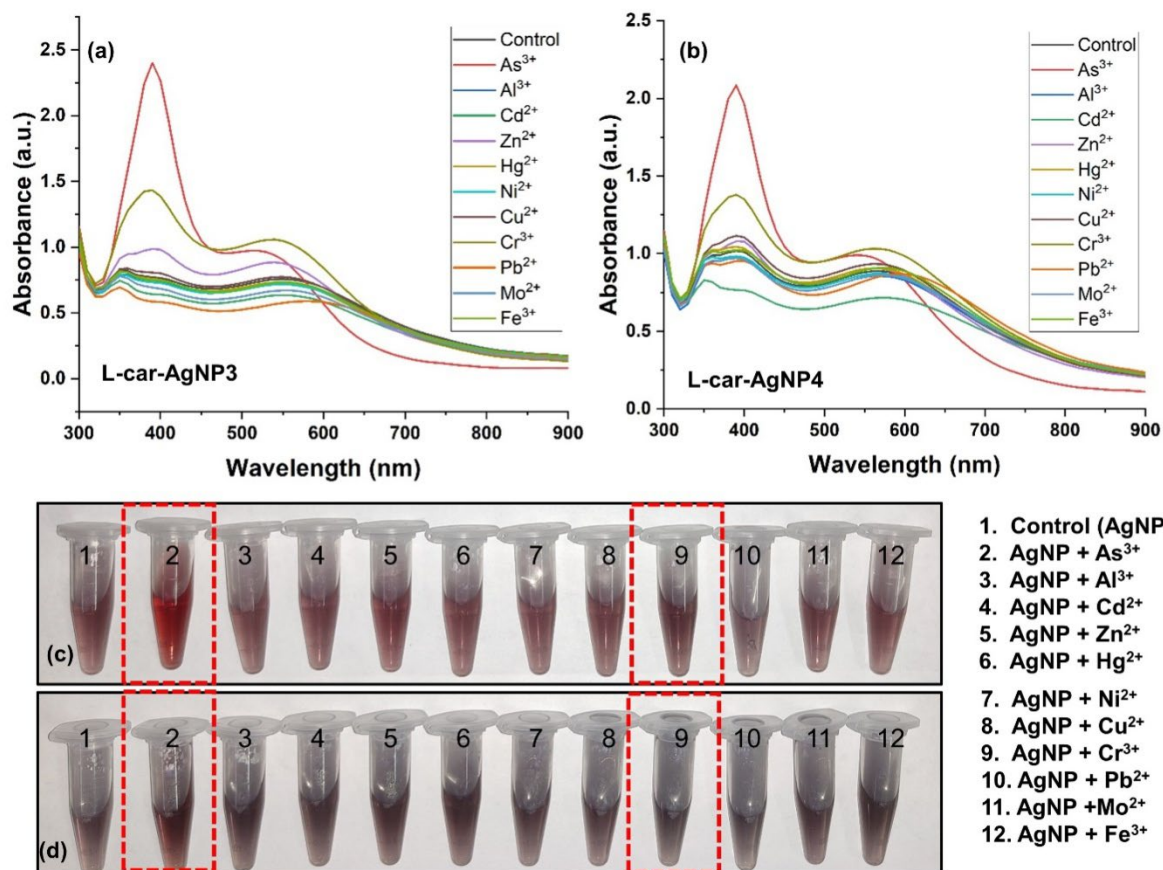

**Figure S5:** Spectrophotometric detection of heavy metal ions using (a) L-car-AgNP3 and (b) L-car-AgNP4. Colorimetric detection of heavy metal ions using (c) L-car-AgNP3 and (d) L-car-AgNP4.

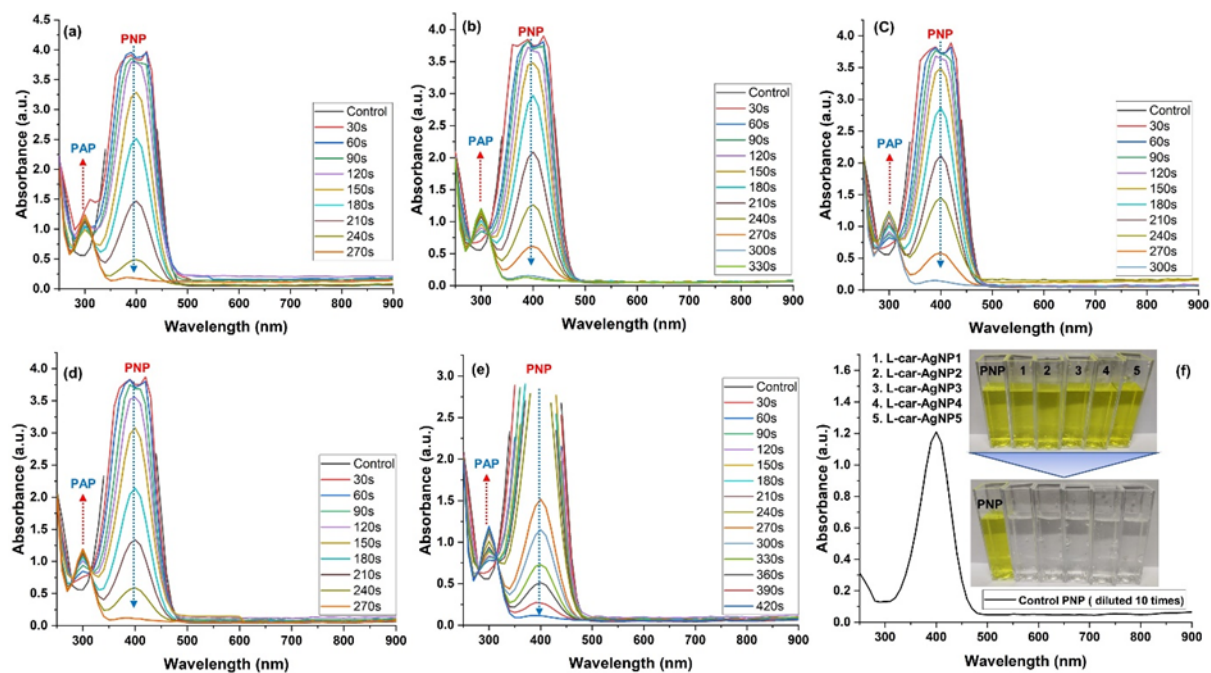

**Figure S6:** Catalytic degradation of 1 mM P-NP using (a) L-car-AgNP1, (b) L-car-AgNP2, (c) L-car-AgNP3, (d) L-car-AgNP4, and (e) L-car-AgNP5. (f) Colorimetric image showing the degradation of P-NP in the presence of L-car-AgNPs.
